# Supplementary material for: Evaluation of structural and ultrastructural changes in thyroid and parathyroid glands after near infrared irradiation: study on an animal model
Source: PeerJ journal article supplement (doi:10.7717/peerj.11891), 2021-08-05
Supplement: report.pdf [file report.pdf]

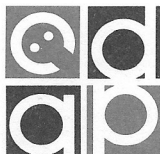

EXPOSIÇÃO A RADIAÇÃO LUMINOSA

ESPECIMEN Nº: **A**

IRRADIADO: Sim/ Não

DIAS PÓS-IRRADIAÇÃO: 0 dias/ 30 dias/ 60 dias.

GLÂNDULA TIROIDEIA: **Identificada/ Não identificada.**

**Sem alterações morfológicas/ Com alterações**

GLÂNDULAS PARATIROIDEIAS: **Identificada/ Não identificadas.**

**Sem alterações morfológicas/ Com alterações**

OBSERVAÇÕES:

*φ D. 6/8/88*

EXPOSIÇÃO A RADIAÇÃO LUMINOSA

ESPECIMEN Nº: **B**

IRRADIADO: Sim/ Não

DIAS PÓS-IRRADIAÇÃO: 0 dias/ 30 dias/ 60 dias.

GLÂNDULA TIROIDEIA: **Identificada/ Não identificada.**

**Sem alterações morfológicas/ Com alterações**

GLÂNDULAS PARATIROIDEIAS: **Identificada/ Não identificadas.**

**Sem alterações morfológicas/ Com alterações**

OBSERVAÇÕES:

*φ D. 5/8/88*

EXPOSIÇÃO A RADIAÇÃO LUMINOSA

ESPECIMEN Nº: **C**

IRRADIADO: Sim/ Não

DIAS PÓS-IRRADIAÇÃO: 0 dias/ 30 dias/ 60 dias.

GLÂNDULA TIROIDEIA: **Identificada/ Não identificada.**

**Sem alterações morfológicas/ Com alterações**

GLÂNDULAS PARATIROIDEIAS: **Identificada/ Não identificadas.**

**Sem alterações morfológicas/ Com alterações**

OBSERVAÇÕES:

*φ D. 4/8/88*

EXPOSIÇÃO A RADIAÇÃO LUMINOSA

ESPECIMEN Nº: **D**

IRRADIADO: Sim/ Não

DIAS PÓS-IRRADIAÇÃO: 0 dias/ 30 dias/ 60 dias.

GLÂNDULA TIROIDEIA: **Identificada/ Não identificada.**

**Sem alterações morfológicas/ Com alterações**

GLÂNDULAS PARATIROIDEIAS: **Identificada/ Não identificadas.**

**Sem alterações morfológicas/ Com alterações**

OBSERVAÇÕES:

*φ D. 5/1/88*

Dra. Sara Turpin

Patologista

*Sara Turpin*

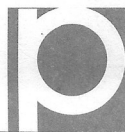

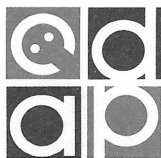

EXPOSIÇÃO A RADIAÇÃO LUMINOSA

ESPECIMEN Nº: 421

IRRADIADO: Sim/ Não

DIAS PÓS-IRRADIAÇÃO: 0 dias/ 30 dias/ 60 dias.

GLÂNDULA TIROIDEIA: Identificada/ Não identificada.

Sem alterações morfológicas/ Com alterações

GLÂNDULAS PARATIROIDEIAS: Identificada/ Não identificadas.

Sem alterações morfológicas/ Com alterações

OBSERVAÇÕES:

30 d.

C/ BXP

EXPOSIÇÃO A RADIAÇÃO LUMINOSA

ESPECIMEN Nº: 422

IRRADIADO: Sim/ Não

DIAS PÓS-IRRADIAÇÃO: 0 dias/ 30 dias/ 60 dias.

GLÂNDULA TIROIDEIA: Identificada/ Não identificada.

Sem alterações morfológicas/ Com alterações

GLÂNDULAS PARATIROIDEIAS: Identificada/ Não identificadas.

Sem alterações morfológicas/ Com alterações

OBSERVAÇÕES:

30 d.

C/ BXP

EXPOSIÇÃO A RADIAÇÃO LUMINOSA

ESPECIMEN Nº: 424

IRRADIADO: Sim/ Não

DIAS PÓS-IRRADIAÇÃO: 0 dias/ 30 dias/ 60 dias.

GLÂNDULA TIROIDEIA: Identificada/ Não identificada.

Sem alterações morfológicas/ Com alterações

GLÂNDULAS PARATIROIDEIAS: Identificada/ Não identificadas.

Sem alterações morfológicas/ Com alterações

OBSERVAÇÕES:

30 d.

C/ BXP

EXPOSIÇÃO A RADIAÇÃO LUMINOSA

ESPECIMEN Nº: 430

IRRADIADO: Sim/ Não

DIAS PÓS-IRRADIAÇÃO: 0 dias/ 30 dias/ 60 dias.

GLÂNDULA TIROIDEIA: Identificada/ Não identificada.

Sem alterações morfológicas/ Com alterações

GLÂNDULAS PARATIROIDEIAS: Identificada/ Não identificadas.

Sem alterações morfológicas/ Com alterações

OBSERVAÇÕES:

30 d.

C/ BXP

Dra. Paula Guerra

Patologista

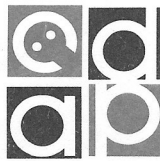

EXPOSIÇÃO A RADIAÇÃO LUMINOSA

ESPECIMEN Nº: **431**

IRRADIADO: Sim/ Não

DIAS PÓS-IRRADIAÇÃO: 0 dias/ 30 dias/ 60 dias.

GLÂNDULA TIROIDEIA: **Identificada/ Não identificada.**

**Sem alterações morfológicas/ Com alterações**

GLÂNDULAS PARATIROIDEIAS: **Identificada/ Não identificadas.**

**Sem alterações morfológicas/ Com alterações**

OBSERVAÇÕES:

30 D. 5/ Ex 8

EXPOSIÇÃO A RADIAÇÃO LUMINOSA

ESPECIMEN Nº: **432**

IRRADIADO: Sim/ Não

DIAS PÓS-IRRADIAÇÃO: 0 dias/ 30 dias/ 60 dias.

GLÂNDULA TIROIDEIA: **Identificada/ Não identificada.**

**Sem alterações morfológicas/ Com alterações**

GLÂNDULAS PARATIROIDEIAS: **Identificada/ Não identificadas.**

**Sem alterações morfológicas/ Com alterações**

OBSERVAÇÕES:

30 D. 5/ Ex 1

EXPOSIÇÃO A RADIAÇÃO LUMINOSA

ESPECIMEN Nº:

IRRADIADO: Sim/ Não

DIAS PÓS-IRRADIAÇÃO: 0 dias/ 30 dias/ 60 dias.

GLÂNDULA TIROIDEIA: **Identificada/ Não identificada.**

**Sem alterações morfológicas/ Com alterações**

GLÂNDULAS PARATIROIDEIAS: **Identificada/ Não identificadas.**

**Sem alterações morfológicas/ Com alterações**

OBSERVAÇÕES:

EXPOSIÇÃO A RADIAÇÃO LUMINOSA

ESPECIMEN Nº:

IRRADIADO: Sim/ Não

DIAS PÓS-IRRADIAÇÃO: 0 dias/ 30 dias/ 60 dias.

GLÂNDULA TIROIDEIA: **Identificada/ Não identificada.**

**Sem alterações morfológicas/ Com alterações**

GLÂNDULAS PARATIROIDEIAS: **Identificada/ Não identificadas.**

**Sem alterações morfológicas/ Com alterações**

OBSERVAÇÕES:

Dra. Paula Guerra

Patologista

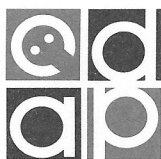

EXPOSIÇÃO A RADIAÇÃO LUMINOSA

ESPECIMEN Nº: **403**

IRRADIADO: Sim/ Não

DIAS PÓS-IRRADIAÇÃO: 0 dias/ 30 dias/ 60 dias.

GLÂNDULA TIROIDEIA: **Identificada/ Não identificada.**

**Sem alterações morfológicas/ Com alterações**

GLÂNDULAS PARATIROIDEIAS: **Identificada/ Não identificadas.**

**Sem alterações morfológicas/ Com alterações**

OBSERVAÇÕES:

C1 ExP  
60 D

EXPOSIÇÃO A RADIAÇÃO LUMINOSA

ESPECIMEN Nº: **404**

IRRADIADO: Sim/ Não

DIAS PÓS-IRRADIAÇÃO: 0 dias/ 30 dias/ 60 dias.

GLÂNDULA TIROIDEIA: **Identificada/ Não identificada.**

**Sem alterações morfológicas/ Com alterações**

GLÂNDULAS PARATIROIDEIAS: **Identificada/ Não identificadas.**

**Sem alterações morfológicas/ Com alterações**

OBSERVAÇÕES:

60 D  
C1 ExP

EXPOSIÇÃO A RADIAÇÃO LUMINOSA

ESPECIMEN Nº: **405**

IRRADIADO: Sim/ Não

DIAS PÓS-IRRADIAÇÃO: 0 dias/ 30 dias/ 60 dias.

GLÂNDULA TIROIDEIA: **Identificada/ Não identificada.**

**Sem alterações morfológicas/ Com alterações**

GLÂNDULAS PARATIROIDEIAS: **Identificada/ Não identificadas.**

**Sem alterações morfológicas/ Com alterações**

OBSERVAÇÕES:

60 D  
C1 ExP

EXPOSIÇÃO A RADIAÇÃO LUMINOSA

ESPECIMEN Nº: **406**

IRRADIADO: Sim/ Não

DIAS PÓS-IRRADIAÇÃO: 0 dias/ 30 dias/ 60 dias.

GLÂNDULA TIROIDEIA: **Identificada/ Não identificada.**

**Sem alterações morfológicas/ Com alterações**

GLÂNDULAS PARATIROIDEIAS: **Identificada/ Não identificadas.**

**Sem alterações morfológicas/ Com alterações**

OBSERVAÇÕES:

60 D  
C1 ExP

Dra. Sara Turpin

Patologista

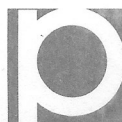

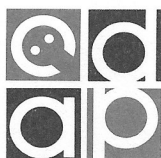

EXPOSIÇÃO A RADIAÇÃO LUMINOSA

ESPECIMEN Nº: 407

IRRADIADO: Sim/ Não

DIAS PÓS-IRRADIAÇÃO: 0 dias/ 30 dias/ 60 dias.

GLÂNDULA TIROIDEIA: Identificada/ Não identificada.

Sem alterações morfológicas/ Com alterações

GLÂNDULAS PARATIROIDEIAS: Identificada/ Não identificadas.

Sem alterações morfológicas/ Com alterações

OBSERVAÇÕES:

60 D 9 EXP

EXPOSIÇÃO A RADIAÇÃO LUMINOSA

ESPECIMEN Nº: 415

IRRADIADO: Sim/ Não

DIAS PÓS-IRRADIAÇÃO: 0 dias/ 30 dias/ 60 dias.

GLÂNDULA TIROIDEIA: Identificada/ Não identificada.

Sem alterações morfológicas/ Com alterações

GLÂNDULAS PARATIROIDEIAS: Identificada/ Não identificadas.

Sem alterações morfológicas/ Com alterações

OBSERVAÇÕES:

60 D  
51 EXP

EXPOSIÇÃO A RADIAÇÃO LUMINOSA

ESPECIMEN Nº: 420

IRRADIADO: Sim/ Não

DIAS PÓS-IRRADIAÇÃO: 0 dias/ 30 dias/ 60 dias.

GLÂNDULA TIROIDEIA: Identificada/ Não identificada.

Sem alterações morfológicas/ Com alterações

GLÂNDULAS PARATIROIDEIAS: Identificada/ Não identificadas.

Sem alterações morfológicas/ Com alterações

OBSERVAÇÕES:

30 D  
9 EXP

EXPOSIÇÃO A RADIAÇÃO LUMINOSA

ESPECIMEN Nº: 423

IRRADIADO: Sim/ Não

DIAS PÓS-IRRADIAÇÃO: 0 dias/ 30 dias/ 60 dias.

GLÂNDULA TIROIDEIA: Identificada/ Não identificada.

Sem alterações morfológicas/ Com alterações

GLÂNDULAS PARATIROIDEIAS: Identificada/ Não identificadas.

Sem alterações morfológicas/ Com alterações

OBSERVAÇÕES: ADENOMA DA PARATIROIDEIA

30 D  
9 EXP

Dra. Sara Turpin

Patologista

Sara Turpin

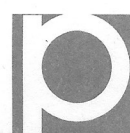

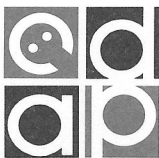

EXPOSIÇÃO A RADIAÇÃO LUMINOSA

ESPECIMEN Nº: 416

IRRADIADO: Sim/ Não

DIAS PÓS-IRRADIAÇÃO: 0 dias/ 30 dias/ 60 dias.

GLÂNDULA TIROIDEIA: Identificada/ Não identificada.

Sem alterações morfológicas/ Com alterações

GLÂNDULAS PARATIROIDEIAS: Identificada/ Não identificadas.

Sem alterações morfológicas/ Com alterações

OBSERVAÇÕES:

60 D. 51 EP

~~60 D. 51 EP~~

EXPOSIÇÃO A RADIAÇÃO LUMINOSA

ESPECIMEN Nº: 417

IRRADIADO: Sim/ Não

DIAS PÓS-IRRADIAÇÃO: 0 dias/ 30 dias/ 60 dias.

GLÂNDULA TIROIDEIA: Identificada/ Não identificada.

Sem alterações morfológicas/ Com alterações

GLÂNDULAS PARATIROIDEIAS: Identificada/ Não identificadas.

Sem alterações morfológicas/ Com alterações

OBSERVAÇÕES:

60 D. 51 EP

EXPOSIÇÃO A RADIAÇÃO LUMINOSA

ESPECIMEN Nº: 418

IRRADIADO: Sim/ Não

DIAS PÓS-IRRADIAÇÃO: 0 dias/ 30 dias/ 60 dias.

GLÂNDULA TIROIDEIA: Identificada/ Não identificada.

Sem alterações morfológicas/ Com alterações

GLÂNDULAS PARATIROIDEIAS: Identificada/ Não identificadas.

Sem alterações morfológicas/ Com alterações

OBSERVAÇÕES:

30 D. 4 EP

EXPOSIÇÃO A RADIAÇÃO LUMINOSA

ESPECIMEN Nº: 419

IRRADIADO: Sim/ Não

DIAS PÓS-IRRADIAÇÃO: 0 dias/ 30 dias/ 60 dias.

GLÂNDULA TIROIDEIA: Identificada/ Não identificada.

Sem alterações morfológicas/ Com alterações

GLÂNDULAS PARATIROIDEIAS: Identificada/ Não identificadas.

Sem alterações morfológicas/ Com alterações

OBSERVAÇÕES:

30 D. 4 EP

Dra. Paula Guerra

Patologista
